# Supplementary material for: Structure determination of a metastable Au22(SAdm)16 nanocluster and its spontaneous transformation into Au21(SAdm)15
Source: Royal Society of Chemistry journal article supplement (doi:10.1039/d0nr07124b), 2020-01-01
Supplement: d0nr07124b1.pdf [file d0nr07124b1.pdf]

## Supporting Information

### Structure Determination of a Metastable $\text{Au}_{22}(\text{SAdm})_{16}$ Nanocluster and Its Spontaneous Transformation into $\text{Au}_{21}(\text{SAdm})_{15}$

Qinzhen Li,<sup>a</sup> Sha Yang,<sup>c</sup> Tao Chen,<sup>a</sup> Shan Jin,<sup>c</sup> Jinsong Chai,<sup>\*b,c</sup> Hui Zhang<sup>\*a</sup> and  
Manzhou Zhu<sup>\*b,c</sup>

<sup>a</sup> School of Physics and Materials Science, Anhui University, Hefei, Anhui, 230601, People's Republic of China

<sup>b</sup> Department of Chemistry and Centre for Atomic Engineering of Advanced Materials, Anhui Province Key Laboratory of Chemistry for Inorganic/Organic Hybrid Functionalized Materials, Anhui University, Hefei, Anhui, 230601, China.

<sup>c</sup> Institutes of Physical Science and Information Technology, Key Laboratory of Structure and Functional Regulation of Hybrid Materials of Ministry of Education, Anhui University, Hefei, Anhui, 230601, China.

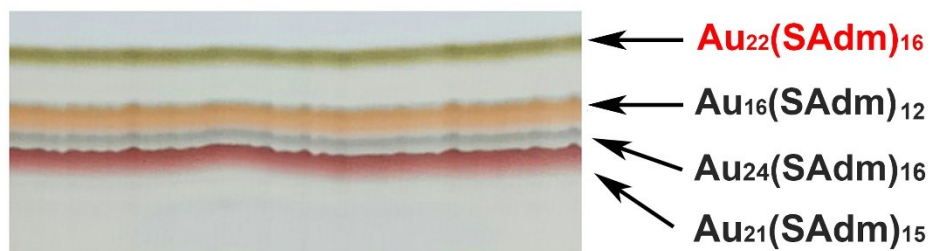

**Fig. S1** Photograph of the raw product separated by TLC plate.

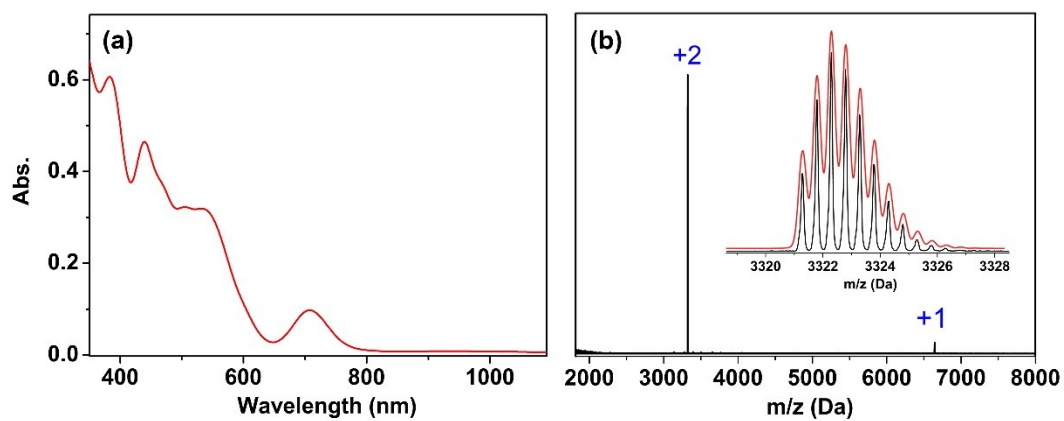

**Fig. S2** UV-vis spectrum (a) and ESI-MS pattern (b) of the  $\text{Au}_{21}$  purified by TLC plate. Inset shows the calculated isotopic pattern of  $\text{Au}_{21}$  with +2 charge (red) compared with the experimental signal (black).

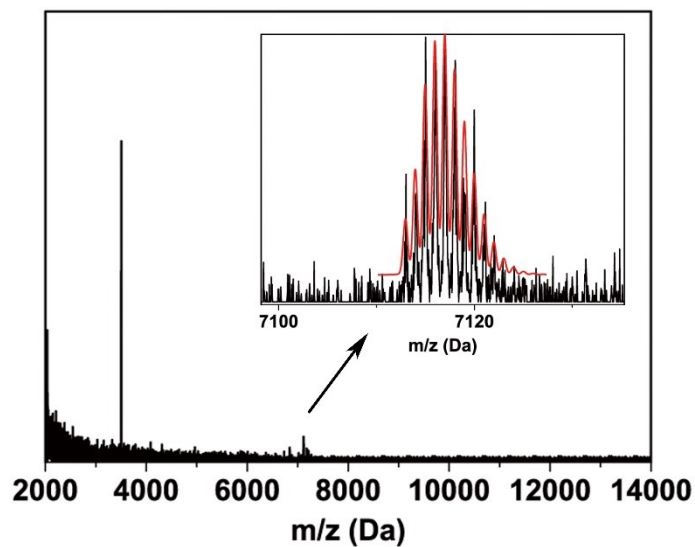

**Fig. S3** ESI-MS spectrum of Au<sub>22</sub> with prolonged acquisition time showing the [Au<sub>22</sub>(SAdm)<sub>16</sub> + Ag<sup>+</sup>] species.

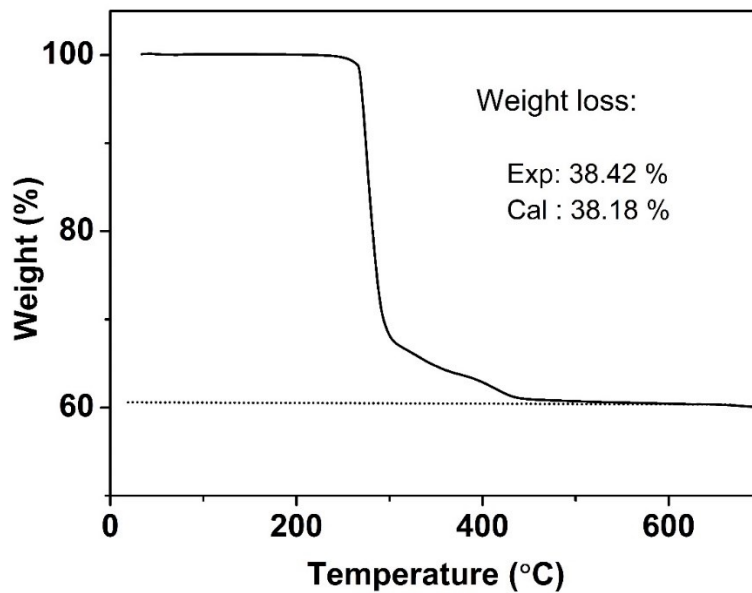

**Fig. S4** TGA curve of Au<sub>22</sub>.

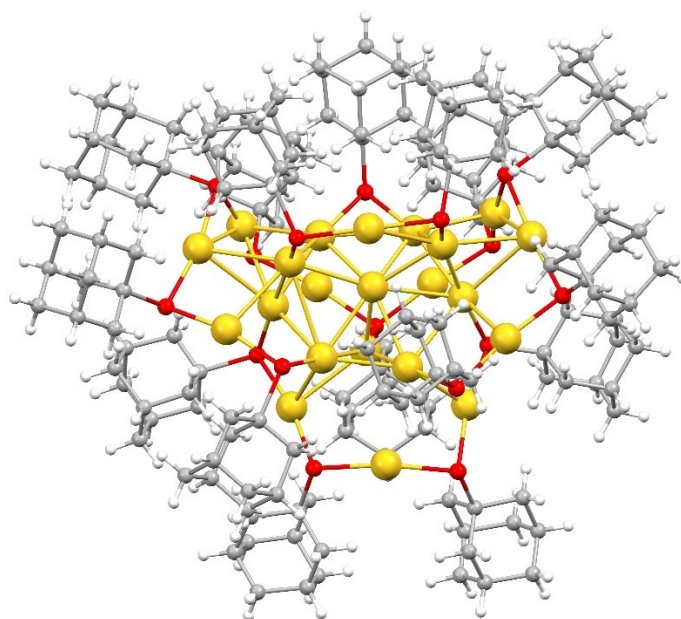

**Fig. S5** Total structure of Au<sub>22</sub> (color labels: yellow = Au, red = S, gray = C, white = H).

**Table S1.** Crystal data for Au<sub>22</sub>.

|                      | Au <sub>22</sub>                                                   |
|----------------------|--------------------------------------------------------------------|
| Empirical formula    | C <sub>160</sub> H <sub>240</sub> Au <sub>22</sub> S <sub>16</sub> |
| Formula weight       | 7009.73                                                            |
| Temperature          | 120 K                                                              |
| Wavelength           | 1.54186 Å                                                          |
| Crystal system       | monoclinic                                                         |
| Space group          | P2 <sub>1</sub> /c                                                 |
| Unit cell dimensions | a = 16.3688(16)                                                    |
|                      | b = 32.3268(9)                                                     |
|                      | c = 36.999(2)                                                      |
|                      | α = 90°                                                            |
|                      | β = 97.356(7)°                                                     |
|                      | γ = 90°                                                            |

|                        |                                   |
|------------------------|-----------------------------------|
| Volume                 | 19417(2)                          |
| Z                      | 4                                 |
| Density (calculated)   | 2.398 g/cm <sup>3</sup>           |
| Absorption coefficient | 32.258                            |
| F(000)                 | 12776                             |
| Crystal size           | 0.1 x 0.07 x 0.06 mm <sup>3</sup> |

**Table S2.** Comparison of bond lengths in Au<sub>22</sub> and Au<sub>21</sub>.

|                    | Au <sub>22</sub>          | Au <sub>21</sub>          | Diff.  |
|--------------------|---------------------------|---------------------------|--------|
| Au(core)-Au(core)  | 2.61-3.22 Å (Avg. 2.81 Å) | 2.65-3.20 Å (Avg. 2.84 Å) | -0.88% |
| Au(core)-Au(motif) | 2.85-3.20 Å (Avg. 3.03 Å) | 2.84-3.25 Å (Avg. 3.02 Å) | +0.33% |
| Au(core)-S(motif)  | 2.35-2.39 Å (Avg. 2.36 Å) | 2.22-2.46 Å (Avg. 2.35 Å) | +0.42% |
| Au(motif)-S(motif) | 2.27-2.32 Å (Avg. 2.30 Å) | 2.15-2.45 Å (Avg. 2.31 Å) | -0.43% |

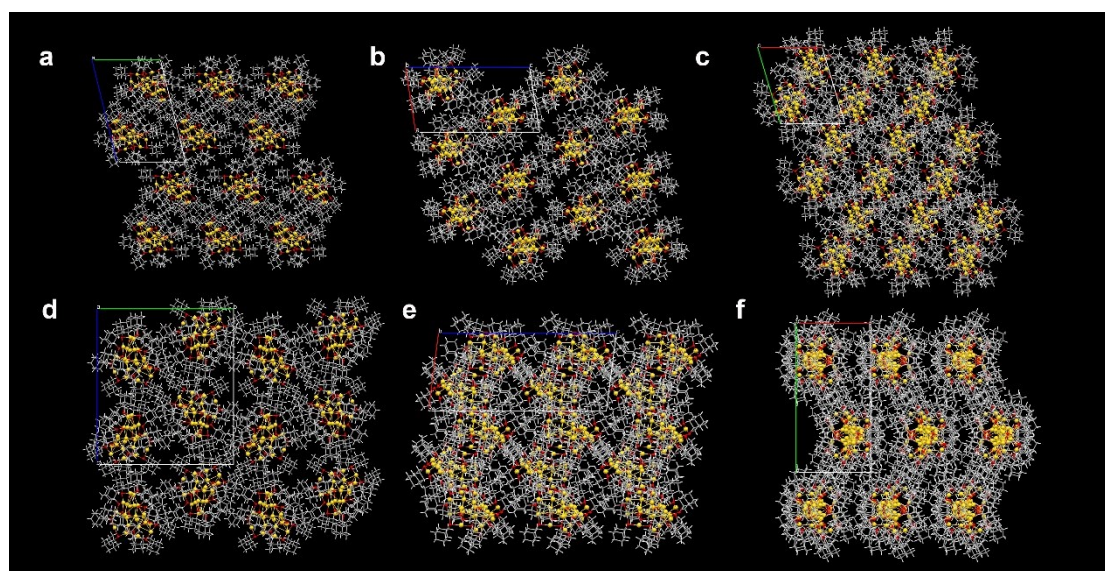

**Fig. S6** Packing mode of Au<sub>21</sub> viewed from the a axle (a), b axle (b) and c axle (c) and Au<sub>22</sub> viewed from the a axle (d), b axle (e) and c axle (f). (color labels: yellow = Au; red = S; grey = C; white = H).

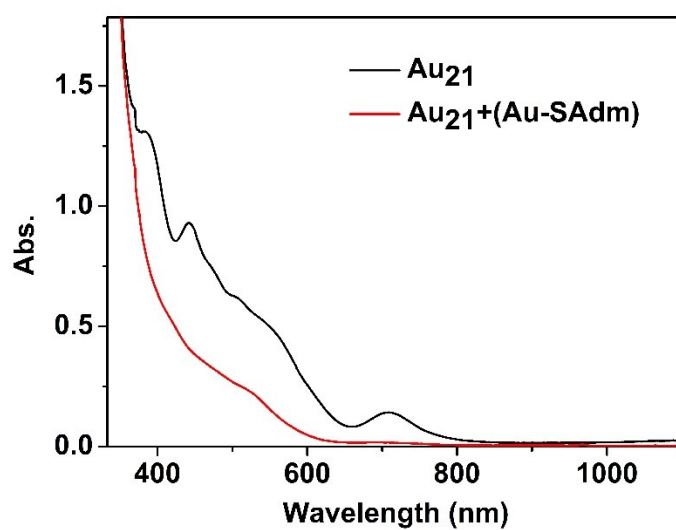

**Fig. S7** UV-vis spectra of Au<sub>21</sub> (black curve) and Au<sub>21</sub> reacting with Au-SAdm complex for 12 h (red curve).

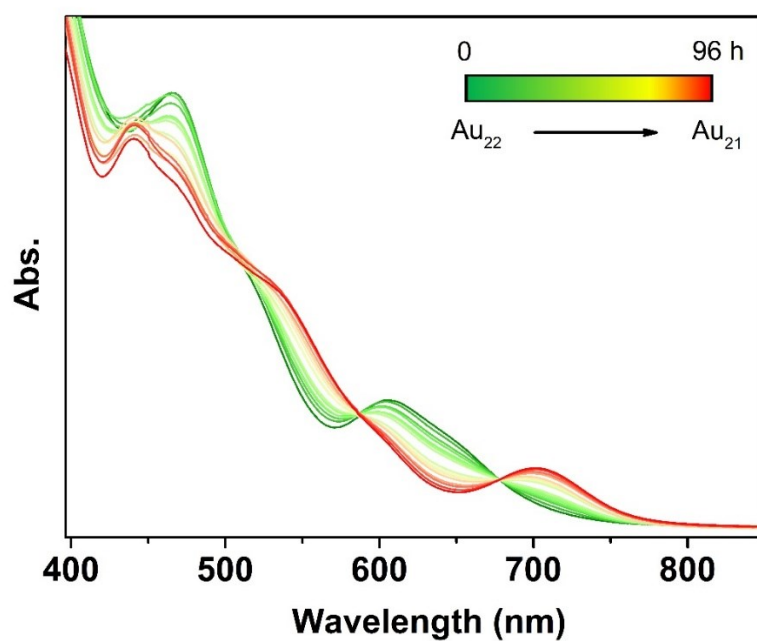

**Fig. S8** Time-dependent UV-vis spectra of Au<sub>22</sub> in n-Hex.

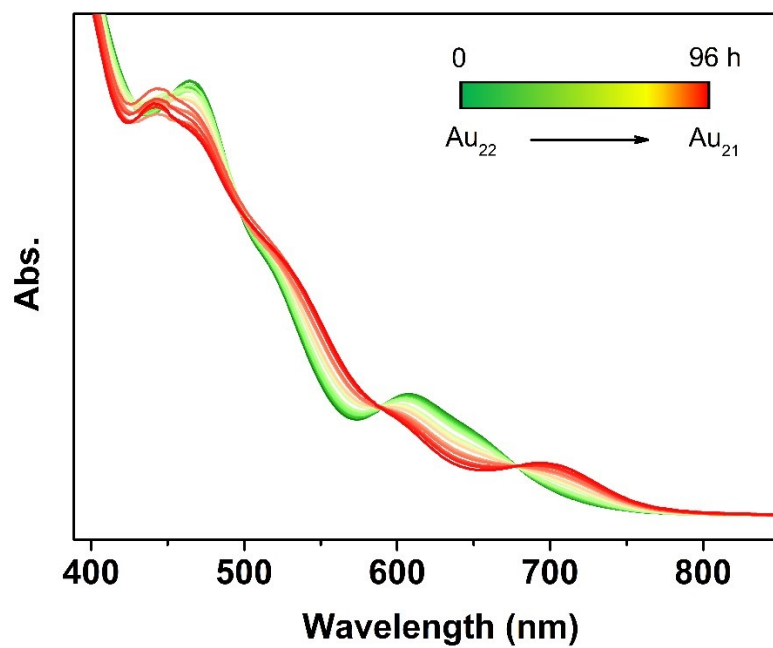

**Fig. S9** Time-dependent UV-vis spectra of Au<sub>22</sub> in toluene.

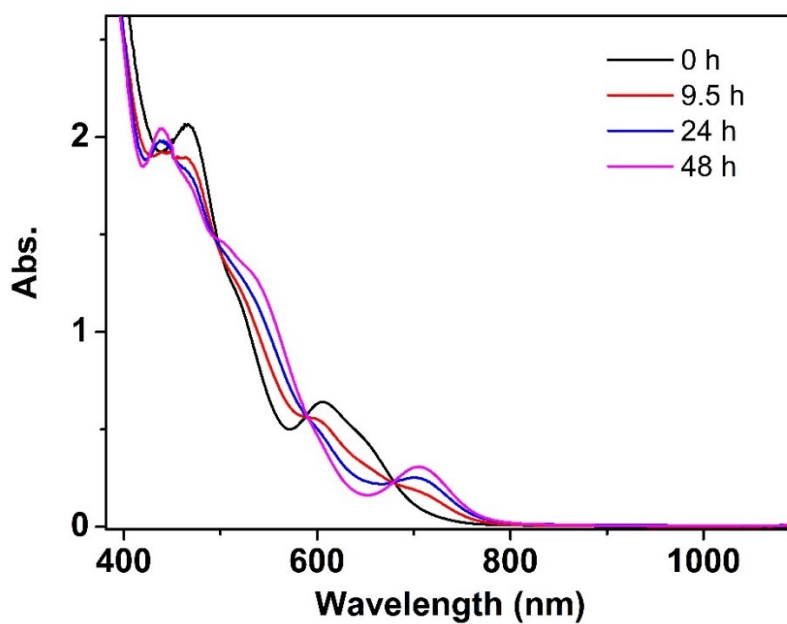

**Fig. S10** Time-dependent UV-vis spectra of Au<sub>22</sub> in deoxidized CHCl<sub>3</sub> under N<sub>2</sub> atmosphere.

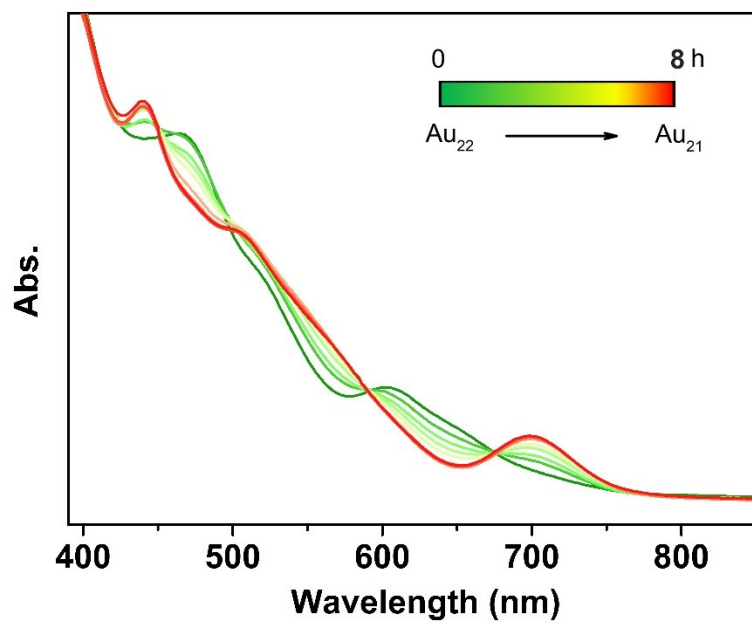

**Fig. S11** Time-dependent UV-vis spectra of Au<sub>22</sub> in CHCl<sub>3</sub>/EtOH.

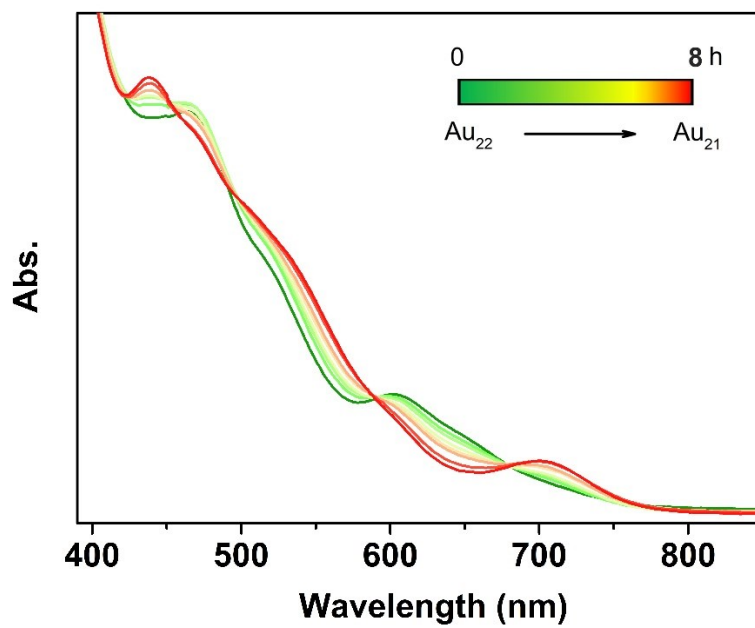

**Fig. S12** Time-dependent UV-vis spectra of Au<sub>22</sub> in CHCl<sub>3</sub>/Et<sub>2</sub>O.



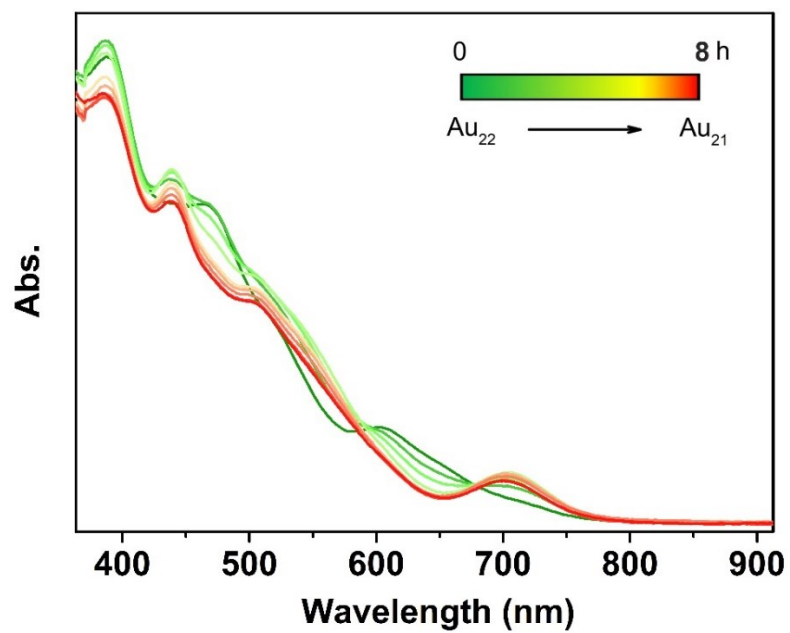

**Fig. S13** Time-dependent UV-vis spectra of Au<sub>22</sub> in CHCl<sub>3</sub>/MeCN.
